# Supplementary material for: MicroRNA expression profiles and clinicopathological implications in lung adenocarcinoma according to EGFR, KRAS, and ALK status
Source: PubMed Central journal article supplement (PMC5352416; doi:10.18632/oncotarget.14298), 2016-12-27
Supplement: oncotarget-08-8484-s001.pdf [file oncotarget-08-8484-s001.pdf]

# MicroRNA expression profiles and clinicopathological implications in lung adenocarcinoma according to *EGFR*, *KRAS*, and *ALK* status

## SUPPLEMENTARY MATERIALS

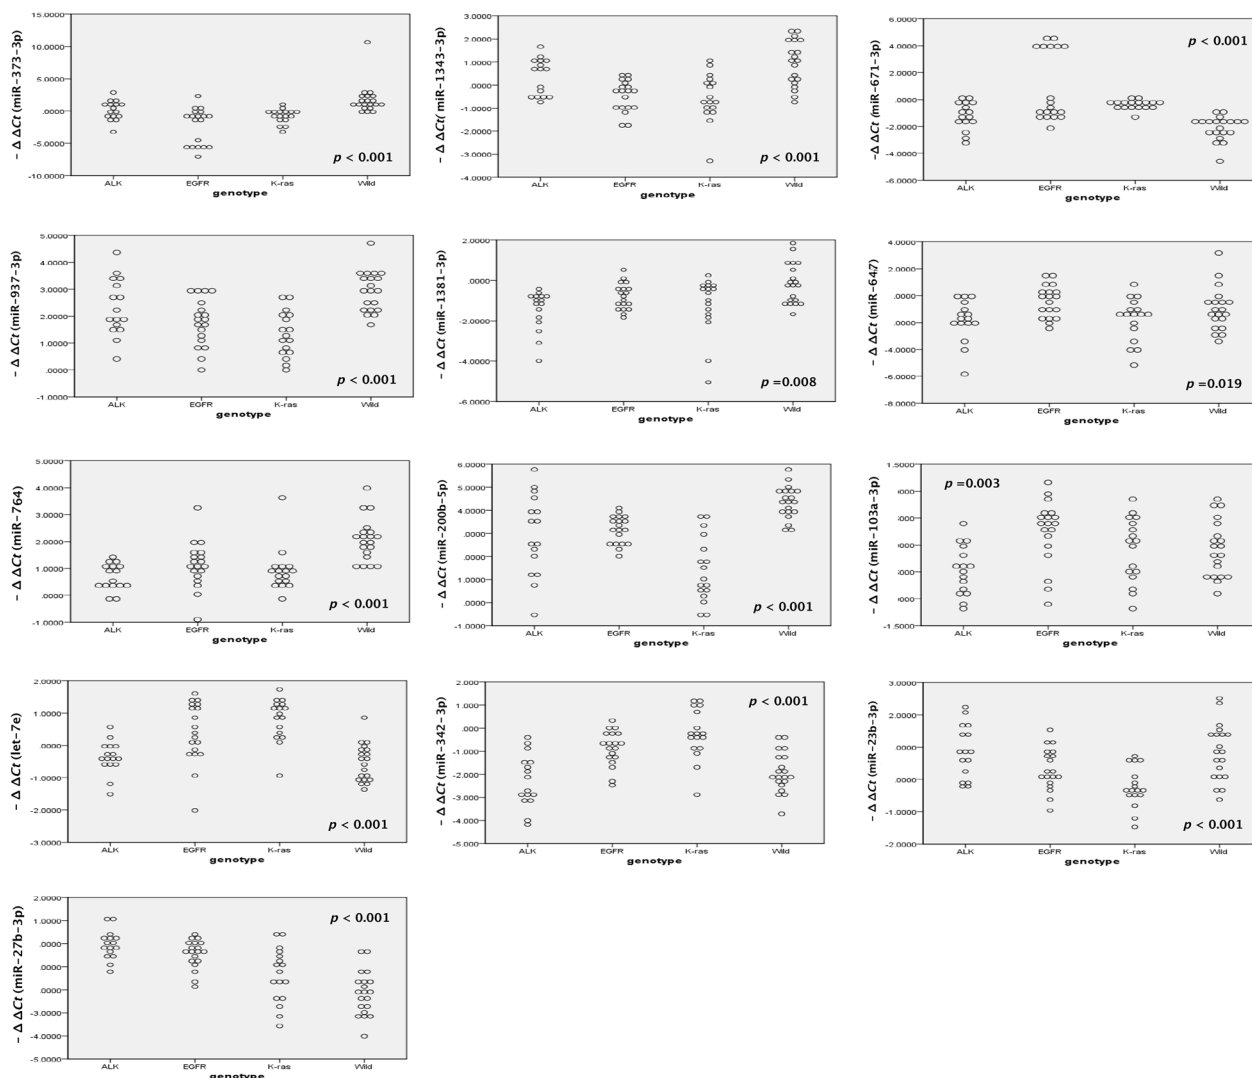

Supplementary Figure 1: Dot plots of microRNA expressions in lung adenocarcinomas according to genetic status (*ALK*-rearranged, *EGFR*-mutated, *KRAS*-mutated, and triple negative).

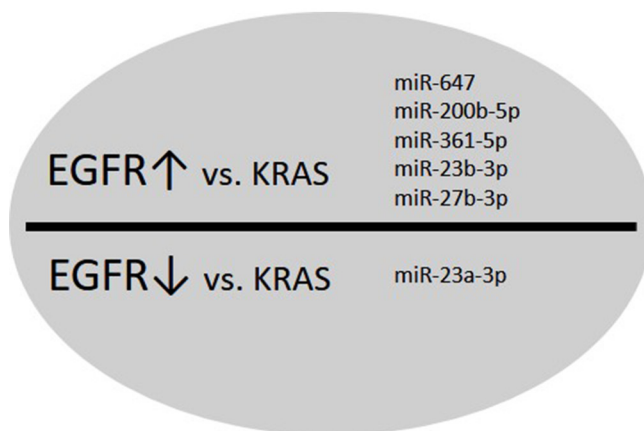

Supplementary Figure 2: Differential expressions of microRNAs in *EGFR*-mutated lung adenocarcinomas, compared to *KRAS*-mutated lung adenocarcinomas.

Supplementary Table 1: Association between *ALK* rearrangement and E-cadherin expression in lung adenocarcinomas of *EGFR*, *KRAS* and *ALK* groups (n = 52)

|           | Total N(%) | E-cadherin, N(%) |          |                |
|-----------|------------|------------------|----------|----------------|
|           |            | No loss          | Loss     | <i>p</i> value |
| ALK       | 16 (30.8)  | 6 (37.5)         | 10(62.5) | 0.002*         |
| EGFR+KRAS | 36 (69.2)  | 29(80.6)         | 7 (19.4) |                |

\* Statistically significant (*p* < 0.05)
